# Supplementary material for: Evolutionary History of Contagious Bovine Pleuropneumonia Using Next Generation Sequencing of Mycoplasma mycoides Subsp. mycoides “Small Colony”
Source: PLoS One. 2012 Oct 8;7(10):e46821. doi: 10.1371/journal.pone.0046821 (PMC3468273; doi:10.1371/journal.pone.0046821)
Supplement: Figure S4 — Alignment of polymorphic sites of 62 concatenated core genes from 20 MmmSC strains. Multifasta file containing only polymorphic bases, used for analysis with the PHYLIP package. (FAS) [file pone.0046821.s004.fas]

>8740-Rita
GCGTGGGGGTCCTTGAAGGGA---GGCTCGCCTGGCCCGCGGGCCCCCCGCACCCAGAAC
CGGACCAGACGTTAAAACGTGCCAGACGCGAAATATTCCGCTAAGGCACCCCCAACAAGC
GGTGGGGAGCGCTACCGCG
>2004-003
GCGTGGGGGTCCCTGACGGGA---GGCTCGCCTGTCTCGCGGGCCTCCCGCCCCCAGAAC
CGAGCTAGACGTTAAAACGTGCCTGACGCGAAGTGCCCCGCTAAGGCGCCCCTAACAAAC
GGTGGGGAGCGCTACCGCG
>2003-036
GCGCGGGGGTCCTTGACGGGA---GGCTCGCCTGGCTCGCGGGCCTCCCGCACCCAGAAC
CGAGCCAGACGTTGAAACGTGCCAGACGCGAAGTGTTCCGCTAAGGCACCCCCAACAAGC
GGTGGGGGGCGCTGCCGCG
>2003-011
GCGTGGGGGTCCCAGACGGTA---GGCTCGCCTGGCTCGCGGGCCTCCCTCCCCCGGAAC
CGAGCCATACGTTAAAACATGCCTGACGCGAAGTGCTCCGCTAAGGCACCCCTAACAGGC
GGTGGGGAGCGCTACCGTG
>T1-44
GCGTGGGAGTCCCTGACGGGA---GGCTCGCCTGGCTCGCAGGCCTCCCGCCCCCAGAAC
CGAGCCAGATGTTAAAAAGTGCCTGACGCGAAGTGCTCCGCTAGGGCATCCCTAACAAGC
GGTGGAAAGCGCTACCGCG
>Segovia
GCGTGGGGGTCCCTGGCGGGA---GGCCCGCTTGGCTCACGGGCCTCCTGCCCCCAGAAC
TGAGGCGGACGTTACAACGCGCCTGACGCGATGTGCCCCGCCAAGGCACCCCTAATTAGC
AGTGGGGAGCACTACCGCG
>Santander
GCGTGGGGGTCCCTGGCGGGA---GGCCCGCTTGGCTCACGGGCCTCCTGCCCCCAGAAC
TGAGGCGGACGTTACAACGCGCCTGACGCGATGTGCCCCGCCAAGGCACCCCTAATTAGC
AGTGGGGAGCACTACCGCG
>112-4
GCGTGGGGGTCCCTGGCGGGA---GGCCCGCTCGGCTCACGGGCCTCCTGCCCCCAGAAC
TGAGGCGGACGTTACAACGCGCCTGACGCGATGTGCCCCGCCAAGGCACCCCTAGTTAGC
AGTGGGGAGCGCTACCGCG
>PO1967
GCGTGGGGGTCCCTGGCGGGA---GGCCCGCTTGGCTTGCGGGCCTCCTGCCCCCAGAAC
TGAGGCGGACGTTACAACGCGCCTGACGCGATGTGCCCCGCCAAGGCACCCCTAACAAGC
AGTGGGGAGCGCTACCGCG
>PO2
GCGTGGGGGTCCCTGGCGGGA---GGCCCTCTTGGCTCACGGGCCTCCTGCCCCCAGAAC
TGAGGCGGACGTTACAACGCGCCTGACGCGATGTGCCCCTCCAAGGCACCCCTAATTAGC
AGTGGGGAGCGCTACCGCG
>6969
GCGTGGGGGTCCCTGGCGGGA---GGCCCGCTTGGCTCACGGGCCTCCTGCCCCCAGAAC
TGAGGCGGACGTTACAACGCGCCTGACGCGATGTGCCCCGCCAAGGCACCCCTAGTTAGC
AGTGGGGAGCGCTACCGCG
>KH3J
acgtggaggcccttgaaggga---ggtttgtctggctcgcggaccccccgtacccagaac
cgggccagacgctaaaacgtgccagacggaaagtattccgttaaagcacccacaacaagc
ggaggggaacgctactgca
>Gladysdale
gcgtgagggtccctgacggga---ggctcgcctggctcgcgggcctctcgcctccagaac
cgagccagacgttaaaacgtgcctgacgcgaagtgccccgctaaggcacccctaacaagc
ggtggggagcgctaccgcg
>Gemugoffa
gcgtgggggtccttgacgggg---ggctcgcctagctcgcgggccccccgcacccaaaat
cgagccagacgttaaaacgtgtcaggcgcgaagtgttccgctaaggcacccctaacaagc
ggtggggagcgctaccgcg
>C425-93
gcgtgggggtccctggcggga---ggcccgcttggctcacgggcctcctgcccccagaac
tgaggcgggcgttacatcgcgcctgacgcgatgtgccccgccaaggcacccctaattagc
agtggggagcgctatcgcg
>B345-93
gcgtgggggtccctggcggga---ggcccgcttggctcacgggcctcctgcccccagaac
tgaggcgggcgttacaacgcgcctgacacgatgtgccctgccaaggcacccctaattagc
agtggggagcgctatcgcg
>99048
GCGTGAGGGTCCCTGACGGGA---GGCTCGCCTGGCTCGCGGGCCTCCCGCCTCCAGAAC
CGAGCCAGACGTTAAAACGTGCCTGACGCGAAGTGCCCCGCTAAGGCACCCCTAACAAGC
GGTGGGGAGCGCTACCGCG
>94111
GCGTGGGGGTCCTTGACGGGG---GGCTCGCCTAGCTCGTGGGCCCTCCGCACCCAAAAT
CGAGCCAGACGTTAAAACGTGCCAGACGCGAAGTGTTCCGCTAAGGCACCCCTAACAAGT
GGTGGGGAGCGCTACCGCG
>9373-804
GCGTGGGGGTCCTTGACGGGA---GGCTCGCCTGGCTCGCGGGCCTCCCGCACCCAGAAC
CGAGCCAGACGTTAAAACGTGCCAGACGCGAAGAGTTACGCTAAGACACTCCCAACAAGC
GGTGGGGAGCGCTGCCGCG
>PG1
gtatcgggttttctaacatgatataactcgtttggttcgcgagtttcccgcccttaggtc
ctagccagacataaacacgtacttcatgcggagtgccccgcctaggtacctctgacaagc
gataaggagtgtcaccacg
